Original Article

# Prevalence and Risk Factors of Self-Reported Smell and Taste Alterations: Results from the 2011–2012 US National Health and Nutrition Examination Survey (NHANES)

Shristi Rawal<sup>1</sup>, Howard J. Hoffman<sup>2</sup>, Kathleen E. Bainbridge<sup>2</sup>,  
Tania B. Huedo-Medina<sup>1</sup> and Valerie B. Duffy<sup>1</sup>

<sup>1</sup>Department of Allied Health Sciences, University of Connecticut, Storrs, CT 06269, USA and <sup>2</sup>Epidemiology & Statistics Program, National Institute on Deafness and Other Communication Disorders (NIDCD), National Institutes of Health (NIH), Bethesda, MD 20892, USA

Correspondence to be sent to: Valerie B. Duffy, Department of Allied Health Sciences, University of Connecticut, 358 Mansfield Road, Unit 1101, Storrs, CT 06269, USA. e-mail: [valerie.duffy@uconn.edu](mailto:valerie.duffy@uconn.edu)

Accepted 14 September 2015.

## Abstract

Chemosensory problems challenge health through diminished ability to detect warning odors, consume a healthy diet, and maintain quality of life. We examined the prevalence and associated risk factors of self-reported chemosensory alterations in 3603 community-dwelling adults (aged 40+ years), from the nationally representative, US National Health and Nutrition Examination Survey (NHANES) 2011–2012. In this new NHANES component, technicians surveyed adults in the home about perceived smell and taste problems, distortions, and diminished abilities since age 25 (termed “alterations”), and chemosensory-related health risks and behaviors. The prevalence of self-reported smell alteration was 23%, including phantosmia at 6%; taste was 19%, including dysgeusia at 5%. Prevalence rates increased progressively with age, highest in those aged 80+ years (smell, 32%; taste, 27%). In multivariable logistic regression, controlling for sociodemographics, health behaviors, and chemosensory-related conditions, the strongest independent risk factor for smell alteration was sinonasal symptoms (odds ratio [OR] = 2.06; 95% confidence interval [CI]: 1.63–2.61), followed by heavy drinking, loss of consciousness from head injury, family income  $\leq$ 110% poverty threshold, and xerostomia. For taste, the strongest risk factor was xerostomia (OR = 2.65; 95% CI: 1.97–3.56), followed by nose/facial injury, lower educational attainment, and fair/poor health. Self-reported chemosensory alterations are prevalent in US adults, supporting increased attention to decreasing their modifiable risks, managing safety/health consequences, and expanding chemosensory screening/testing and treatments.

**Key words:** dry mouth, dysgeusia, head injury, health status, phantosmia

## Introduction

The chemosenses, smell and taste, respond to chemical stimuli, including hazardous chemicals, food flavors, and pleasurable aromas. The Disability Supplement to the 1994 National Health Interview Survey

(NHIS), administered to 42 000 randomly selected households, provided the first national estimates for perceived chemosensory problems in US adults—smell problems in 2.7 million and taste problems in 1.1 million adults, both estimates showing increases with age

(Hoffman et al. 1998). Chemosensory problems are more common in older adults, challenging their ability to detect environmental hazards (Pence et al. 2014) and maintain healthy diet (Duffy et al. 1995; Aschenbrenner et al. 2008), weight (Richardson et al. 2004; Simchen et al. 2006), and quality of life (Smeets et al. 2009). For the first time, National Health and Nutrition Examination Survey (NHANES) 2011–2012 administered a taste and smell protocol to US adults aged  $\geq 40$  years (CDC 2013b). The purpose was to document the extent and comorbidities of smell or taste problems, losses and distortions, labels that we collectively refer to here as “alterations.”

The label “alterations” applied to olfactory perception can encompass partial (hyposmia) to complete (anosmia) loss, and distorted (parosmia) or phantom (phantosmia) smells. These alterations have been associated with sinonasal diseases, upper respiratory infections, head trauma, neurodegenerative diseases, and advancing age (Mann 2002). From odor identification testing, prevalence of anosmia or hyposmia in recent epidemiological studies range from 13.9% to 32.9% in adults 53 years and older, and show age-related increases (Murphy et al. 2002; Brämerson et al. 2004; Wehling et al. 2011; Schubert et al. 2012). However, some older adults perform as well as young adults in olfactory testing; healthy aging may stave off olfactory impairment associated with age-related neurodegeneration and decline in health, memory, and cognition (Rawson 2006). About 1 in 5 patients with chemosensory problems report parosmia or phantosmia (Philpott and Boak 2014); the prevalence of phantosmia or parosmia in the general population, however, is largely unknown.

In terms of taste alterations, complete (ageusia) or moderate-to-severe (hypogeusia) taste loss is rare (Mann 2002), as 3 cranial nerves relay taste information from oral cavity to the brain. Regional taste loss on the anterior tongue is more common (Bartoshuk et al. 2012). The chorda tympani nerve, which innervates the anterior tongue, traverses the middle ear, and is susceptible to damage from infectious agents, middle-ear surgeries, and head trauma (Bartoshuk et al. 2012). Regional taste loss can alter flavor perception (Bartoshuk et al. 2012) and/or produce dysgeusia (distorted, often persistent taste). Dysgeusia also can result from metabolic abnormalities in chronic systemic diseases or their treatments (Ng et al. 2004; Hovan et al. 2010). In the 1994 NHIS, age-related increases in self-reported taste problems were attributed primarily to dysgeusia rather than to loss in taste perception (Hoffman et al. 1998). Taste disturbances also could be caused by some dental procedures, oral infections, or by factors related to oral health (Bromley 2000; Bergdahl and Bergdahl 2002; Shibata et al. 2015).

Previous clinical and population studies (Nordin et al. 1995; Murphy et al. 2002; Wehling et al. 2011) report good specificity (correct identification of normal) but lower sensitivity (correct identification of dysfunction) for self-reported smell ability. Improved sensitivity can be achieved by asking about current and age-related changes in smell (Ship and Weffenbach 1993; Rawal et al. 2014), as well as probing about specific taste qualities and food flavor to minimize smell–taste confusion. Smell is confused with taste when perceived via the mouth and centrally combined with other sensory inputs into unified flavor experiences (Rolls 2006). Subjective assessments also are the primary means to determine chemosensory distortions (e.g., dysgeusia, phantosmia), perceived changes in functioning, and impact on health and quality of life.

As part of national health improvement objectives, US Healthy People 2020 recently included chemosensory-related objectives to encourage identification, treatment, and risk-management of chemosensory disorders (HHS 2015). Accordingly, rapid smell and taste assessments previously standardized in the NIH Toolbox project

(NIH 2012) were adapted for implementation in the NHANES 2011–2014 taste and smell protocol. The protocol comprised a self-report questionnaire in the home-interview (Chemosensory Questionnaire, CSQ) and brief tests in the mobile exam centers (CDC 2013b). The CSQ asked about perceived smell and taste problems and distortions, chemosensory losses with aging, and related risk factors and treatment of chemosensory alterations among US adults aged  $\geq 40$  years (CDC 2013c). Using these nationally representative data, we examined the prevalence and associated risk factors of self-reported smell and taste alterations in US adults.

## Materials and methods

### Study population

NHANES 2011–2012 collected questionnaire data and clinical measures from a nationally representative sample of the civilian, noninstitutionalized US population, identified using multistage, stratified probability sampling. The analytical sample was limited to 3603 adults, ages  $\geq 40$  years, who answered the CSQ (response rate 99.9%). Approval was obtained from the National Center for Health Statistics Research Ethics Review Board. All participants provided written informed consent. The study complied with the Declaration of Helsinki for medical research involving human subjects.

### Self-reported chemosensation

The CSQ (CDC 2013c), developed for NHANES based on previous research (Hoffman et al. 1998; Murphy et al. 2002; Rawal et al. 2014) and standard clinical assessments, included single questions capturing perceived smell and taste problems within the past year, dysgeusia and its quality (e.g., metallic, bitter), phantosmia, and changes since age 25 in ability to smell, taste (sweet, salty, sour, bitter), and perceive food flavors (chocolate, strawberry, vanilla). The complete questionnaire, codebook, and data are publicly available online (CDC 2013c). The CSQ was content-validated by chemosensory experts and tested for response problems and cultural appropriateness. Validity and reliability estimates of some CSQ questions have been reported from 2 studies with community-based samples (Rawal et al. 2014, 2015).

Trained interviewers administered the CSQ in the respondent's home; if smell or taste problems were reported, participants were prompted about their effects on quality of life, and whether their problems were discussed with healthcare providers. Participants answered questions on common conditions (e.g., sinonasal, head/orofacial injury) (Mann 2002) that increase risk of chemosensory alterations.

### Prevalence estimates

Responses to 3 questions were used in defining self-reported smell alteration and deriving its prevalence estimate: problem with ability to smell in the past year (yes/no); change in ability to smell since age 25 (better/worse/no change); and smelling an unpleasant/bad/burning odor when nothing is there (yes/no). Participants were categorized as having smell alteration if they reported a recent problem, worse sense of smell since age 25, or phantosmia.

Responses to 7 questions were used in defining self-reported taste alteration and deriving its prevalence estimate: problem tasting sweet, sour, salty, or bitter in foods and drinks in the past year (yes/no); separate responses to change in ability to taste salty, sweet, sour, bitter since age 25 (better/worse/no change); change in ability to taste food flavors such as chocolate, vanilla, or strawberry since age 25 (better/worse/no change); and in the past year, having

a taste or other sensation in mouth that does not go away (yes/no). Participants were categorized as having taste alteration if they reported a recent problem, dysgeusia, or worse ability to perceive flavors or taste salt, sweet, sour, or bitter since age 25.

### Sociodemographic, behavioral, and health risk factors

A number of putative risk factors, obtained from self-report questionnaires used in NHANES, were evaluated for their associations with reported smell or taste alterations. These questionnaires and the corresponding data and codebooks are available online for public use (CDC 2013a). Smoking exposure was categorized as none (never smoked 100 cigarettes), <10 pack years (PY, packs of cigarettes smoked per day  $\times$  years smoked), and  $\geq 10$  PY. Sinonasal symptoms were defined as self-report of either persistent cold/flu ( $\geq 1$  month) or frequent allergy-related nasal congestion during the past year. Marital status was dichotomized into married or not (widowed/divorced/separated/never married/living with partner). Educational attainment was dichotomized—*not having completed high school versus high school graduate or above*. Income-to-poverty ratio [IPR, family income divided by federal poverty threshold established by the US Census Bureau (Census 2014)] was used as a measure of socioeconomic status, and was analyzed as quartiles (Sabanayagam and Shankar 2012). Self-rated health was dichotomized (excellent/very good/good versus fair/poor). Participants were defined as physically active if they reported doing at least 10 continuous minutes of vigorous- or moderate-intensity activity  $\geq 3$  days a week. Interview questions also asked about xerostomia (persistent dry mouth) during the past year, and lifetime histories of the following: tonsillectomy; loss of consciousness from head injury, broken nose or other serious injury to face/skull; heavy drinking ( $\geq 4/5$  drinks daily); multiple ( $\geq 3$ ) ear infections; and insertion of tympanostomy tubes to drain fluid from ear(s).

### Data and statistical analysis

Statistical analyses were accomplished using STATA, version 12.0. We employed sample weights to account for unequal probabilities of selection, nonresponse bias, and oversampling of certain subgroups in NHANES 2011–2012. Bivariable relationships between self-reported smell or taste alterations and sociodemographic or health characteristics were assessed with chi square or 2-tailed *t*-tests.

Risk factors for self-reported smell or taste alterations were identified by unconditional logistic regression models. Results are reported as odds ratios (ORs) with 95% confidence intervals (CIs). To identify independent risk factors of self-reported smell or taste alterations, multivariable logistic regression models were developed using a purposeful selection method (Bursac et al. 2008). In the purposeful selection method, only variables with *P*-value  $< 0.25$  in the univariate analyses are evaluated in the initial multivariable model. In the iterative process of variable selection for the final model, covariates are removed from the multivariable model if they are non-significant (*P*  $> 0.1$ ) and not confounders (i.e., the covariate does not change the remaining parameter estimates by more than 15% when removed from the full model). Further details on the purposeful selection process have been described previously (Bursac et al. 2008).

Potential 2-way interactions were tested, and the models were tested for goodness of fit, multicollinearity and misspecifications (UCLA 2015). Missing data (14.4%) were imputed using the Markov Chain Monte Carlo method, a multiple imputation method based on the Bayesian estimation approach (Donders et al. 2006). Unique risk factors for phantosmia and dysgeusia were investigated in separate analyses (results not shown).

## Results

Table 1 provides sociodemographic and health characteristics of the study participants, and the prevalence of reported smell and taste alterations by these characteristics. The prevalence of adults who reported smell or taste alteration increased with age, from lowest among the 40–49 year-olds to highest in the  $\geq 80$  year-olds; no sex differences were observed.

### Prevalence of self-reported smell and taste alteration in US adults $\geq 40$ years

#### Smell alteration

The proportion of adults who reported smell problems within the past year was 10.6% (95% CI: 8.5–12.6%). More adults, 16.7% (95% CI: 14.4–19%), reported smell loss since age 25. Only 6% (95% CI: 4.9–7%) reported experiencing phantom odors, of which almost two-thirds were females.

The prevalence of any self-reported smell alterations was 23.3% (95% CI: 19.9–26%). The Venn diagram in Figure 1 shows the number of individuals who were classified as having smell alterations based on responses to only a single question (no overlap in responses) or multiple questions (overlap in responses). The question on smell problems in the past year showed the least overlap with the other 2 smell-related questions: only 9% with smell alteration indicated smell problems alone without phantosmia or smell loss with age. Of those who reported smell problems (*N* = 374), 76% (*N* = 285) reported smell loss since age 25 and 17% (*N* = 63) reported phantosmia.

#### Taste alteration

The proportion of adults who reported taste problems within the past year was 5.3% (95% CI: 4.6–6%), much lower than reported smell problems. Similar proportions (3.6–4.7%) were seen for loss across salty, sweet, sour, and bitter qualities. About equal proportions reported that their ability to taste these specific taste qualities was better than when they were age 25 (5–7%). Approximately 10% (95% CI: 8.6–11%) noted a loss in ability to “taste” food flavors with age. Five percent (95% CI: 3.9–6.3%) reported dysgeusia, of which 64% were females. The most frequent taste qualities persisting in the mouth were bitter and metallic.

The prevalence of self-reported taste alteration was 18.7% (95% CI: 17.2–20.2%). The Venn diagram in Figure 1 shows the number of individuals who were classified as having taste alterations based on responses to only a single question (no overlap in responses) or multiple questions (overlap in responses). The question on taste problems showed the least overlap: only 7% with taste alteration indicated taste problems alone in the past year without dysgeusia or taste/flavor loss with age.

Ten percent of the study sample reported both smell and taste alterations. Thirty-three percent reported either smell or taste alterations; of these, only 12.4% sought healthcare provider attention during the past year, 3.5% tried healthcare provider-recommended treatments, and 3% said their problem interfered with their health, work or enjoyment of life.

### Factors associated with self-reported smell and taste alterations

Table 2 shows crude and adjusted ORs with 95% CIs for risk factors associated with self-reported smell and taste alterations. Results from the original data set are shown, which were not different from results computed with imputed missing data. In multivariable

**Table 1.** Prevalence of reported smell and taste alterations by sociodemographic and health characteristics in the 2011–2012 NHANES participants 40+ years (*N* = 3603)

| Characteristic                                 | All participants | Smell alteration (self-report) |                              | Taste alteration (self-report) |                              |
|------------------------------------------------|------------------|--------------------------------|------------------------------|--------------------------------|------------------------------|
|                                                | <i>N</i>         | %                              | <i>P</i> -value <sup>a</sup> | %                              | <i>P</i> -value <sup>a</sup> |
| All participants                               | 3603             | 23.3                           |                              | 18.7                           |                              |
| Age, years <sup>b</sup>                        |                  |                                | <0.001                       |                                | <0.001                       |
| Mean (SD/SEM)                                  | 59.64 (12.22 SD) | 61.21 (0.42)                   |                              | 61.20 (0.44)                   |                              |
| Age strata                                     |                  |                                | <0.001                       |                                | <0.001                       |
| 40–49 years                                    | 899              | 18.9                           |                              | 16.1                           |                              |
| 50–59 years                                    | 913              | 22.6                           |                              | 21.0                           |                              |
| 60–69 years                                    | 908              | 26.2                           |                              | 23.7                           |                              |
| 70–79 years                                    | 520              | 21.1                           |                              | 20.2                           |                              |
| 80+ years                                      | 363              | 31.7                           |                              | 27.3                           |                              |
| Sex                                            |                  |                                | 0.98                         |                                | 0.74                         |
| Male                                           | 1749             | 23.3                           |                              | 20.8                           |                              |
| Female                                         | 1854             | 23.3                           |                              | 21.2                           |                              |
| Race/ethnicity                                 |                  |                                | <0.001                       |                                | <0.005                       |
| Mexican-American                               | 309              | 23.6                           |                              | 23.3                           |                              |
| Other Hispanic                                 | 400              | 24.2                           |                              | 23.2                           |                              |
| Non-Hispanic black                             | 995              | 21.9                           |                              | 22.3                           |                              |
| Non-Hispanic white                             | 1360             | 26.4                           |                              | 21.2                           |                              |
| Other, includes multiracial                    | 539              | 17.1                           |                              | 15.0                           |                              |
| Marital status                                 |                  |                                | <0.001                       |                                | <0.002                       |
| Married                                        | 1946             | 21.0                           |                              | 19.0                           |                              |
| Not Married                                    | 1651             | 25.9                           |                              | 23.2                           |                              |
| Education                                      |                  |                                | 0.08                         |                                | <0.001                       |
| Less than high school                          | 1013             | 25.3                           |                              | 28.0                           |                              |
| High school or above                           | 2585             | 22.6                           |                              | 18.3                           |                              |
| IPR                                            |                  |                                | <0.001                       |                                | <0.001                       |
| IPR ≤ 1.1                                      | 816              | 29.5                           |                              | 28.2                           |                              |
| 1.1 >IPR ≤ 2.0                                 | 813              | 23.0                           |                              | 23.9                           |                              |
| 2.0 >IPR ≤ 4.2                                 | 810              | 20.2                           |                              | 17.7                           |                              |
| IPR > 4.2                                      | 807              | 20.6                           |                              | 15.6                           |                              |
| Self-rated health                              |                  |                                | <0.001                       |                                | <0.001                       |
| Fair or poor                                   | 839              | 31.3                           |                              | 32.3                           |                              |
| Excellent, very good, or good                  | 2250             | 20.9                           |                              | 17.4                           |                              |
| Physical activity                              |                  |                                | 0.49                         |                                | <0.001                       |
| Yes                                            | 1648             | 22.7                           |                              | 17.5                           |                              |
| No                                             | 1955             | 23.7                           |                              | 23.9                           |                              |
| Smoking exposure                               |                  |                                | <0.001                       |                                | <0.009                       |
| None                                           | 1917             | 20.2                           |                              | 19.4                           |                              |
| <10 PY                                         | 647              | 21.9                           |                              | 19.9                           |                              |
| ≥10 PY                                         | 934              | 30.4                           |                              | 24.3                           |                              |
| “Yes,” have ever had...                        |                  |                                |                              |                                |                              |
| Loss of consciousness due to head injury       | 422              | 33.4                           | <0.001                       | 28.0                           | <0.001                       |
| Broken nose or serious injury to face or skull | 499              | 31.7                           | <0.001                       | 30.9                           | <0.001                       |
| Tonsils removed                                | 839              | 27.1                           | <0.001                       | 22.4                           | 0.13                         |
| Ear infections, 3+ times                       | 689              | 32.7                           | <0.001                       | 26.3                           | <0.001                       |
| Tube placed in ear to drain fluid              | 116              | 35.3                           | <0.001                       | 25.0                           | 0.26                         |
| 4/5 or more drinks every day                   | 450              | 30.9                           | <0.001                       | 26.0                           | <0.007                       |
| “Yes,” in last 12 months...                    |                  |                                |                              |                                |                              |
| Cold/flu for >1 month                          | 223              | 38.6                           | <0.001                       | 26.0                           | <0.05                        |
| Persistent dry mouth                           | 513              | 38.2                           | <0.001                       | 43.1                           | <0.001                       |
| Frequent nasal congestion                      | 924              | 36.3                           | <0.001                       | 26.2                           | <0.001                       |

SD, standard deviation; SEM, standard error of mean.

<sup>a</sup>Two-sided *P*-values for  $\chi^2$  or *t*-test.<sup>b</sup>Value expressed as mean (SD) or mean (SEM).

models, age and sex were not independent predictors of either self-reported smell or taste alteration. Although the final model estimates showed minimal changes with or without the inclusion of age and sex, both were retained in the final model.

Controlling for all variables in the final multivariable model shown in Table 2, independent risk factors for smell alteration were presence of sinonasal symptoms, heavy drinking, xerostomia, history of loss of consciousness from head injury, and low

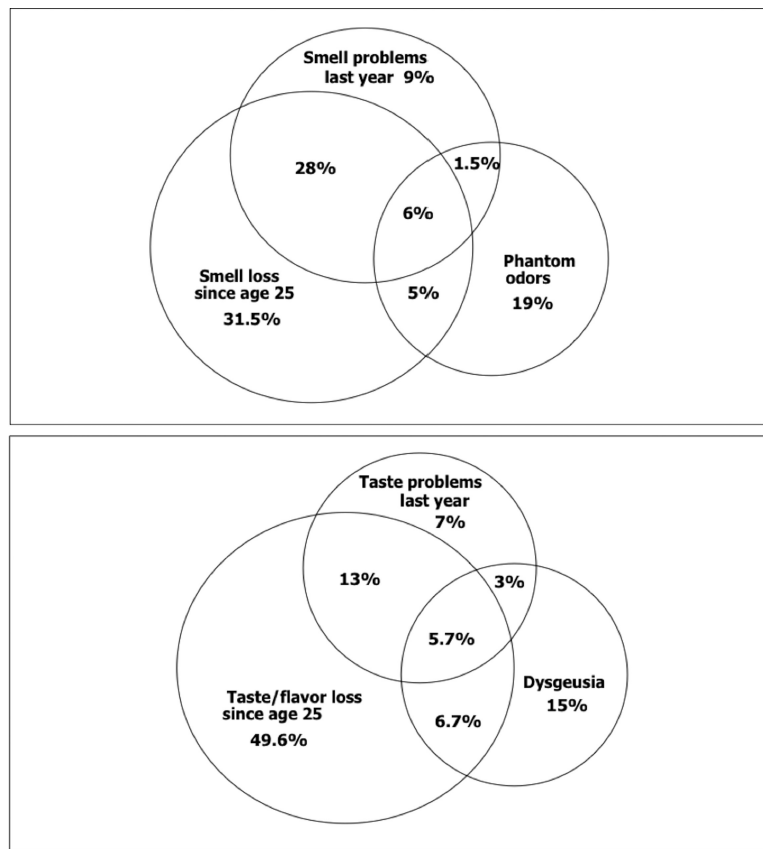

**Figure 1.** Venn diagrams displaying the proportion of NHANES 2011–2012 participants  $\geq 40$  years with self-reported smell ( $n = 839$ ) or taste ( $n = 756$ ) alterations based on responses to a single (no overlap) or multiple (overlap) questions, the percentages adding to 100%; Respective counts are  $n \times$  proportion (e.g., individuals reporting smell problems alone without phantosmia or smell loss with age =  $0.09 \times 839 = 75$ ).

IPR. Based on the nonsignificant  $F$ -statistic, the multivariable model showed good fit [ $F(9, 9) = 1.82$ ;  $P = 0.19$ ]. Those with sinonasal symptoms were twice as likely to report smell alteration compared with those without these problems (OR = 2.06; 95% CI: 1.63–2.61). Lower education, fair/poor health, multiple ear infections,  $\geq 10$  PY of smoking, and nose/facial injury also were significantly associated with increased odds of smell alteration in univariate analyses, but not in the fully adjusted, multivariable model. Unique to phantosmia, female sex and fair/poor health were significant, independent predictors, in addition to sinonasal symptoms, xerostomia, and low IPR (results not shown).

Controlling for all variables in the final multivariable model shown in Table 2, significant independent predictors of self-reported taste alterations were lower education, xerostomia, fair/poor health, and nose/facial injury. Based on the nonsignificant  $F$ -statistic, the multivariable model showed good fit [ $F(9, 9) = 0.84$ ;  $P = 0.60$ ]. Those with xerostomia were over 2 times as likely to report taste alterations than those without (OR = 2.65; 95% CI: 1.97–3.56). Those reporting nose/facial injury had almost twice the odds of reporting taste alterations (OR = 1.90; 95% CI: 1.30–2.76). Although the self-report of taste alteration was significantly associated with race/ethnicity, IPR, and heavy drinking in unadjusted models, these variables were nonsignificant in the fully adjusted, multivariable model. Unique to dysgeusia, history of multiple ear infections was a significant independent predictor in addition to xerostomia and nose/facial injury (results not shown).

## Discussion

Since the 1994 NHIS, this study provides new estimates of the prevalence and associated risk factors of self-reported smell and taste alterations in a nationally representative sample of US adults aged  $\geq 40$  years. The prevalence of smell or taste alterations showed age-related increases and were highest in those aged  $\geq 80$  years. Self-reported smell problems during the past year (10.6%) were twice as prevalent as taste problems (5.2%). Our findings are comparable to recent epidemiological studies with estimates ranging from 6% to 12% for self-reported olfactory problems (Murphy et al. 2002; Wehling et al. 2011; Lee et al. 2013) and from 5.7% to 13.3% for self-reported taste problems (Michikawa et al. 2011; Welge-Lüssen et al. 2011) in participants of similar age. These current NHANES prevalence estimates are higher than 1994 NHIS estimates—the latter queried only about “chronic” taste or smell problems (lasting  $\geq 3$  months) during the preceding year. In NHANES, asking about smell loss with age produced a higher prevalence (17%) than asking about a problem within the past year, mirroring earlier findings in a community-based study with reportedly healthy older females (Rawal et al. 2014). Interestingly, almost equal proportions of adults reported better or worse taste perception with aging. It is uncertain if individuals who report heightened taste sensations actually perceive more intensity or instead are more aware of taste sensations like salt and sweet and like them less as they modify the level of sugar and salt in their diet to manage chronic diseases (IOM 2010). The prevalence of phantom smell or taste problems was lowest when compared with other chemosensory alterations, affecting 1 in 20

**Table 2.** ORs and 95% CIs for risk factors associated with self-reported smell and taste alterations, 2011–2012 NHANES

| Variables                                                     | Self-reported smell alteration (N = 3212) |           |                       |           | Self-reported taste alteration (N = 3081) |           |                       |           |
|---------------------------------------------------------------|-------------------------------------------|-----------|-----------------------|-----------|-------------------------------------------|-----------|-----------------------|-----------|
|                                                               | Crude                                     |           | Adjusted <sup>a</sup> |           | Crude                                     |           | Adjusted <sup>b</sup> |           |
|                                                               | OR                                        | 95% CI    | OR                    | 95% CI    | OR                                        | 95% CI    | OR                    | 95% CI    |
| Age                                                           | 1.01                                      | 1.00–1.02 | 1.01                  | 1.00–1.02 | 1.01                                      | 1.00–1.02 | 1.01                  | 1.00–1.02 |
| Sex (reference “female”)                                      |                                           |           |                       |           |                                           |           |                       |           |
| Male                                                          | 1.05                                      | 0.89–1.24 | 0.99                  | 0.80–1.22 | 1.06                                      | 0.84–1.33 | 1.00                  | 0.75–1.34 |
| Race/ethnicity (reference “non-Hispanic White”)               |                                           |           |                       |           |                                           |           |                       |           |
| Mexican American                                              | 0.92                                      | 0.65–1.29 |                       |           | 1.26                                      | 1.00–1.59 |                       |           |
| Other Hispanic                                                | 0.98                                      | 0.73–1.30 |                       |           | 1.21                                      | 0.92–1.61 |                       |           |
| Non-Hispanic Black                                            | 0.86                                      | 0.63–1.18 |                       |           | 1.28                                      | 1.12–1.45 |                       |           |
| Other race (includes multiracial)                             | 0.90                                      | 0.54–1.49 |                       |           | 0.99                                      | 0.65–1.49 |                       |           |
| Marital status (reference “not married”)                      |                                           |           |                       |           |                                           |           |                       |           |
| Married                                                       | 0.88                                      | 0.73–1.06 |                       |           | 0.84                                      | 0.67–1.05 |                       |           |
| Education (reference “high school or above”)                  |                                           |           |                       |           |                                           |           |                       |           |
| Less than high school                                         | 1.37                                      | 1.03–1.81 |                       |           | 2.00                                      | 1.68–2.37 | 1.76                  | 1.52–2.03 |
| Sinonasal symptoms (reference “no”)                           |                                           |           |                       |           |                                           |           |                       |           |
| Yes                                                           | 2.31                                      | 1.84–2.90 | 2.06                  | 1.63–2.61 | 1.53                                      | 1.14–2.05 | 1.39                  | 0.95–2.01 |
| Xerostomia (reference “no”)                                   |                                           |           |                       |           |                                           |           |                       |           |
| Yes                                                           | 1.97                                      | 1.65–2.36 | 1.44                  | 1.17–1.77 | 3.55                                      | 2.93–4.31 | 2.65                  | 1.97–3.56 |
| Loss of consciousness from head injury (reference “no”)       |                                           |           |                       |           |                                           |           |                       |           |
| Yes                                                           | 1.77                                      | 1.26–2.49 | 1.59                  | 1.06–2.40 | 1.33                                      | 0.95–1.86 |                       |           |
| Nose/facial injury (reference “no”)                           |                                           |           |                       |           |                                           |           |                       |           |
| Yes                                                           | 1.49                                      | 1.08–2.06 |                       |           | 1.86                                      | 1.34–2.59 | 1.90                  | 1.30–2.76 |
| Tonsillectomy (reference “no”)                                |                                           |           |                       |           |                                           |           |                       |           |
| Yes                                                           | 1.38                                      | 0.99–1.94 | 1.32                  | 0.98–1.81 | 0.99                                      | 0.72–1.38 |                       |           |
| Self-rated health (reference “excellent, very good, or good”) |                                           |           |                       |           |                                           |           |                       |           |
| Fair or poor                                                  | 1.64                                      | 1.19–2.26 |                       |           | 2.23                                      | 1.72–2.89 | 1.59                  | 1.11–2.25 |
| Smoking exposure (reference “none”)                           |                                           |           |                       |           |                                           |           |                       |           |
| <10 PY                                                        | 0.93                                      | 0.54–1.63 |                       |           | 0.98                                      | 0.75–1.30 |                       |           |
| ≥10 PY                                                        | 1.63                                      | 1.20–2.20 |                       |           | 1.23                                      | 0.90–1.68 |                       |           |
| Heavy drinking (reference “no”)                               |                                           |           |                       |           |                                           |           |                       |           |
| Yes                                                           | 1.98                                      | 1.50–2.62 | 1.79                  | 1.27–2.51 | 1.43                                      | 1.15–1.79 |                       |           |
| Multiple ear infections (reference “no”)                      |                                           |           |                       |           |                                           |           |                       |           |
| Yes                                                           | 1.45                                      | 1.09–1.92 |                       |           | 1.32                                      | 0.93–1.88 |                       |           |
| Tympanostomy tubes (reference “no”)                           |                                           |           |                       |           |                                           |           |                       |           |
| Yes                                                           | 0.97                                      | 0.58–1.60 |                       |           | 0.79                                      | 0.38–1.65 |                       |           |
| Moderate to vigorous physical activity (reference “no”)       |                                           |           |                       |           |                                           |           |                       |           |
| Yes                                                           | 1.03                                      | 0.77–1.37 |                       |           | 0.74                                      | 0.62–0.87 |                       |           |
| IPR (reference IPR > 4.21)                                    |                                           |           |                       |           |                                           |           |                       |           |
| IPR ≤ 1.1                                                     | 1.58                                      | 1.16–2.16 | 1.51                  | 1.09–2.10 | 1.99                                      | 1.56–2.54 |                       |           |
| 1.1 > IPR ≤ 2.0                                               | 1.11                                      | 0.73–1.70 | 1.01                  | 0.65–1.57 | 2.04                                      | 1.50–2.77 |                       |           |
| 2.0 > IPR ≤ 4.2                                               | 0.97                                      | 0.70–1.19 | 0.90                  | 0.67–1.90 | 1.19                                      | 0.69–1.71 |                       |           |

<sup>a</sup>Adjusted ORs from a parsimonious multivariate regression model consisting of age, sex, sinonasal symptoms, xerostomia, losing consciousness from head injury, tonsillectomy, heavy drinking, and IPR.

<sup>b</sup>Adjusted ORs from a parsimonious multivariate regression model consisting of age, sex, education, sinonasal symptoms, xerostomia, nose or facial injury, and self-rated health.

adults, which is similar to rates reported previously in large samples of dental (Bergdahl and Bergdahl 2002) and otolaryngology (Landis et al. 2004) patients. Self-reported treatment rates for chemosensory alterations were very low at 3.5%. It is unknown if this low level of treatment rate is because adults with self-reported alterations don't view them as enough of a problem to seek help, are unaware of treatment options, or consider them to be untreatable.

Risk factors for smell and taste alterations in this nationally representative study corroborate findings of prior clinical and population-based studies—sinonasal symptoms (Murphy et al. 2002; Lee et al. 2013), heavy drinking (Schubert et al. 2011), and head injury (Henkin et al. 2013) for risk of smell alterations; xerostomia (Bergdahl and Bergdahl 2002) and facial injury (van Damme

and Freihofer 1992) for risk of taste alterations. Sociodemographic characteristics such as education and IPR were important predictors of chemosensory alterations as observed previously (Boesveldt et al. 2011; Schubert et al. 2012; Lee et al. 2013). We did not observe independent influences of sex and age in self-reported smell or taste alteration, although their effects on measured function are well documented (Rawson 2006; Schubert et al. 2012). Age and sex may exert indirect influences on smell or taste such as increasing the frequency of and probability of exposures that cause smell and taste alterations. In addition, changes in function since age 25 were included in the definition of smell or taste alterations. Similar to our findings, a recent study (Soter et al. 2008) observed no gender differences in self-reported ability to taste specific taste qualities except

sucrose. Consistent with previous reports (Bergdahl and Bergdahl 2002; Harris et al. 2006), more women reported phantosmia and dysgeusia in this nationally representative study.

Two limitations of this study are the cross-sectional design, limiting inference on temporality of observed associations, and reliance on self-report data. Self-reported smell function, in particular, may not be a sensitive indicator of measured alteration especially in mild cases (Murphy et al. 2002; Rawal et al. 2014). In population-based studies (Nordin et al. 1995; Murphy et al. 2002; Shu et al. 2009; Wehling et al. 2011), the prevalence of self-reported smell impairment is consistently lower than the measured prevalence. For example, in 1 US-based population study (Murphy et al. 2002), only 9.5% reported smell impairment compared with measured prevalence of 24.5%; only 20% correctly identified themselves as having smell impairment, with sensitivity estimates that was lower in women than men, and decreased from younger to older age cohorts. Previously reported low sensitivities of self-reported smell alterations however, might have resulted from use of a single question, which simply asked participants to rate their current smell ability (Nordin et al. 1995; Murphy et al. 2002; Wehling et al. 2011). As previously demonstrated, self-reported measures that also ask smell loss with age show better correspondence with measured moderate-to-severe dysfunction (Rawal et al. 2014). The present findings also support using multiple questions to assess perceived chemosensory alteration; for example, only 23% of individuals experiencing phantom odors reported smell problems, and only 28% of those who experienced dysgeusia reported taste problems. Furthermore, subjective assessments are necessary to capture chemosensory distortions (dysgeusia, phantosmia), intermittent losses that may be missed by single measured testing, and to assess perceived health impact of chemosensory alterations.

Findings from this nationally representative survey suggest that self-reported chemosensory alterations are more prevalent in US adults than previously estimated, reinforcing the need to measure and track Healthy People 2020 chemosensory goals aimed at improving diagnosis and treatment rates of chemosensory disorders and reducing their health burden. Taste or smell evaluation is uncommon in gerontological assessments despite the high prevalence of chemosensory alterations in older adults. In clinical settings, an instrument similar to the NHANES CSQ could be used for rapid identification of individuals with chemosensory alterations, facilitating appropriate follow-up for related safety and health needs (e.g., installing natural gas detectors, dietary management). This could be followed-up with additional assessments (Pusswald et al. 2012) to evaluate the effects of chemosensory alterations on health, nutritional status, and/or quality of life and to refer patients to an otolaryngologist, neurologist, or other suitable specialists. Future release of NHANES chemosensory exam data will provide prevalence and associated risk factors of measured chemosensory alterations. Together, findings from the new NHANES taste and smell protocol will have important implications for informing programs and policies to improve prevention, diagnosis, and treatment of chemosensory alterations in the United States.

## Funding

This work was supported by an Interagency Agreement [Y1-DC-0013] between the National Institute on Deafness and Other Communication Disorders (NIDCD), National Institutes of Health (NIH) and the National Center for Health Statistics (NCHS), Centers for Disease Control and Prevention (CDC).

## Acknowledgments

The authors thank the study participants and the dedicated staff who conducted the chemosensory (taste and smell) interview and examination components in the National Health and Nutrition Examination Survey (NHANES).

## References

- Aschenbrenner K, Hummel C, Teszmer K, Krone F, Ishimaru T, Seo HS, Hummel T. 2008. The influence of olfactory loss on dietary behaviors. *Laryngoscope*. 118(1):135–144.
- Bartoshuk LM, Catalanotto F, Hoffman H, Logan H, Snyder DJ. 2012. Taste damage (otitis media, tonsillectomy and head and neck cancer), oral sensations and BMI. *Physiol Behav*. 107(4):516–526.
- Bergdahl M, Bergdahl J. 2002. Perceived taste disturbance in adults: prevalence and association with oral and psychological factors and medication. *Clin Oral Invest*. 6(3):145–149.
- Boesveldt S, Lindau ST, McClintock MK, Hummel T, Lundstrom JN. 2011. Gustatory and olfactory dysfunction in older adults: a national probability study. *Rhinology* 49(3):324–330.
- Brämerson A, Johansson L, Ek L, Nordin S, Bende M. 2004. Prevalence of olfactory dysfunction: the skövde population-based study. *Laryngoscope*. 114(4):733–737.
- Bromley SM. 2000. Smell and taste disorders: a primary care approach. *Am Fam Phys*. 61(2):427–436, 438.
- Bursac Z, Gauss CH, Williams DK, Hosmer DW. 2008. Purposeful selection of variables in logistic regression. *Source Code Biol Med*. 3:17.
- CDC. 2013a. 2011–2012 National Health and Nutrition Examination Survey (NHANES): Survey operations manuals [Internet]. Centers for Disease Control and Prevention (CDC), National Center for Health Statistics (NCHS). Available from: [http://www.cdc.gov/nchs/nhanes/nhanes2011-2012/manuals11\\_12.htm](http://www.cdc.gov/nchs/nhanes/nhanes2011-2012/manuals11_12.htm)
- CDC. 2013b. National Health and Nutrition Examination Survey (NHANES) Taste and smell examination component manual [Internet]. Centers for Disease Control and Prevention (CDC), National Center for Health Statistics (NCHS). Available from: [http://www.cdc.gov/nchs/data/nhanes/nhanes\\_13\\_14/Taste\\_Smell.pdf](http://www.cdc.gov/nchs/data/nhanes/nhanes_13_14/Taste_Smell.pdf)
- CDC. 2013c. National Health and Nutrition Examination Survey (NHANES) 2011–2012 data documentation, codebook, and frequencies: taste and smell disorders [Internet]. Centers for Disease Control and Prevention (CDC), National Center for Health Statistics (NCHS). Available from: [http://www.cdc.gov/nchs/nhanes/nhanes2011-2012/CSQ\\_G.htm](http://www.cdc.gov/nchs/nhanes/nhanes2011-2012/CSQ_G.htm)
- Census. 2014. How the Census Bureau Measures Poverty [Internet]. United States Census Bureau. Available from: <http://www.census.gov/hhes/www/poverty/about/overview/measure.html>
- Donders AR, van der Heijden GJ, Stijnen T, Moons KG. 2006. Review: a gentle introduction to imputation of missing values. *J Clin Epidemiol*. 59(10):1087–1091.
- Duffy VB, Backstrand JR, Ferris AM. 1995. Olfactory dysfunction and related nutritional risk in free-living, elderly women. *J Am Diet Assoc*. 95(8):879–884; quiz 885.
- Harris R, Davidson TM, Murphy C, Gilbert PE, Chen M. 2006. Clinical evaluation and symptoms of chemosensory impairment: one thousand consecutive cases from the Nasal Dysfunction Clinic in San Diego. *Am J Rhinol*. 20(1):101–108.
- Henkin RI, Levy LM, Fordyce A. 2013. Taste and smell function in chronic disease: a review of clinical and biochemical evaluations of taste and smell dysfunction in over 5000 patients at The Taste and Smell Clinic in Washington, DC. *Am J Otolaryngol*. 34(5):477–489.
- HHS. 2015. Healthy People 2020 Topics & Objectives: Hearing and Other Sensory or Communication Disorders [Internet]. U.S. Department of Health and Human Services, Office of Disease Prevention and Health Promotion. Available from: <http://www.healthypeople.gov/2020/topicsobjectives2020/objectiveslist.aspx?topicId=20>
- Hoffman HJ, Ishii EK, MacTurk RH. 1998. Age-related changes in the prevalence of smell/taste problems among the United States adult population. Results of the 1994 disability supplement to the National Health Interview Survey (NHIS). *Ann N Y Acad Sci*. 855:716–722.

- Hovan AJ, Williams PM, Stevenson-Moore P, Wahlin YB, Ohrn KE, Elting LS, Spijkervet FK, Brennan MT. 2010. A systematic review of dysgeusia induced by cancer therapies. *Support Care Cancer*. 18(8):1081–1087.
- IOM. 2010. Taste and flavor roles of sodium in foods: a unique challenge to reducing sodium intake [Internet]. In: Henney JE, Taylor CL, Boon CS, editors. *Strategies to reduce sodium intake in the United States*. Washington (DC): National Academies Press. Available from: <http://www.ncbi.nlm.nih.gov/books/NBK50958/>
- Landis BN, Konnerth CG, Hummel T. 2004. A study on the frequency of olfactory dysfunction. *Laryngoscope*. 114(10):1764–1769.
- Lee WH, Wee JH, Kim DK, Rhee CS, Lee CH, Ahn S, Lee JH, Cho YS, Lee KH, Kim KS, et al. 2013. Prevalence of subjective olfactory dysfunction and its risk factors: Korean National Health and Nutrition Examination Survey. *PLoS One*. 8:e62725.
- Mann NM. 2002. Management of smell and taste problems. *Cleve Clin J Med*. 69(4):329–336.
- Michikawa T, Nishiwaki Y, Takebayashi T. 2011. Are you conscious of any age-related taste impairment? Prevalence of and factors associated with taste impairment in Japan. *J Am Geriatr Soc*. 59(5):951–953.
- Murphy C, Schubert CR, Cruickshanks KJ, Klein BE, Klein R, Nondahl DM. 2002. Prevalence of olfactory impairment in older adults. *JAMA*. 288(18):2307–2312.
- Ng K, Woo J, Kwan M, Sea M, Wang A, Lo R, Chan A, Henry CJ. 2004. Effect of age and disease on taste perception. *J Pain Symptom Manage*. 28(1):28–34.
- NIH. 2012. *NIH toolbox for the assessment of neurological and behavioral function* [Internet]. National Institutes of Health (NIH), NIH Blueprint for Neuroscience Research. Available from: <http://www.nihtoolbox.org/WhatAndWhy/Sensation>
- Nordin S, Monsch AU, Murphy C. 1995. Unawareness of smell loss in normal aging and Alzheimer's disease: discrepancy between self-reported and diagnosed smell sensitivity. *J Gerontol B Psychol Sci Soc Sci*. 50(4):P187–P192.
- Pence TS, Reiter ER, DiNardo LJ, Costanzo RM. 2014. Risk factors for hazardous events in olfactory-impaired patients. *JAMA Otolaryngol Head Neck Surg*. 140(10):951–955.
- Philpott CM, Boak D. 2014. The impact of olfactory disorders in the United Kingdom. *Chem Senses*. 39(8):711–718.
- Pusswald G, Auff E, Lehrner J. 2012. Development of a brief self-report inventory to measure olfactory dysfunction and quality of life in patients with problems with the sense of smell. *Chemosens Percept*. 5(3–4):292–299.
- Rawal S, Hoffman HJ, Chapo AK, Duffy VB. 2014. Sensitivity and specificity of self-reported olfactory function in a home-based study of independent-living, healthy older women. *Chemosens Percept*. 7(3–4):108–116.
- Rawal S, Hoffman HJ, Honda M, Huedo-Medina TB, Duffy VB. 2015. The taste and smell protocol in the 2011–2014 U.S. National Health and Nutrition Examination Survey (NHANES): test-retest reliability and validity testing. *Chemosens Percept*. 8(3):138–148.
- Rawson NE. 2006. Olfactory loss in aging. *Sci Aging Knowledge Environ*. 2006(5):pe6.
- Richardson BE, Vander Woude EA, Sudan R, Thompson JS, Leopold DA. 2004. Altered olfactory acuity in the morbidly obese. *Obes Surg*. 14(7):967–969.
- Rolls ET. 2006. Brain mechanisms underlying flavour and appetite. *Philos Trans R Soc Lond B Biol Sci*. 361(1471):1123–1136.
- Sabanayagam C, Shankar A. 2012. Income is a stronger predictor of mortality than education in a national sample of US adults. *J Health Popul Nutr*. 30(1):82–86.
- Schubert CR, Cruickshanks KJ, Fischer ME, Huang GH, Klein BE, Klein R, Pankow JS, Nondahl DM. 2012. Olfactory impairment in an adult population: the Beaver Dam Offspring Study. *Chem Senses*. 37(4):325–334.
- Schubert CR, Cruickshanks KJ, Klein BE, Klein R, Nondahl DM. 2011. Olfactory impairment in older adults: five-year incidence and risk factors. *Laryngoscope*. 121(4):873–878.
- Shibata T, Nakamura M, Omori T, Tahara T, Ichikawa Y, Okubo M, Ishizuka T, Nakagawa Y, Nagasaka M, Nakamura M, et al. 2015. The association between individual response for food taste and gastroesophageal symptoms. *J Dig Dis*. 16(6):337–341.
- Ship JA, Weiffenbach JM. 1993. Age, gender, medical treatment, and medication effects on smell identification. *J Gerontol*. 48(1):M26–M32.
- Shu CH, Hummel T, Lee PL, Chiu CH, Lin SH, Yuan BC. 2009. The proportion of self-rated olfactory dysfunction does not change across the life span. *Am J Rhinol Allergy*. 23(4):413–416.
- Simchen U, Koebnick C, Hoyer S, Issanchou S, Sunft HJ. 2006. Odour and taste sensitivity is associated with body weight and extent of misreporting of body weight. *Eur J Clin Nutr*. 60(6):698–705.
- Smeets MA, Veldhuizen MG, Galle S, Gouweloos J, de Haan AM, Vernooij J, Visscher F, Kroeze JH. 2009. Sense of smell disorder and health-related quality of life. *Rehabil Psychol*. 54(4):404–412.
- Soter A, Kim J, Jackman A, Tourbier I, Kaul A, Doty RL. 2008. Accuracy of self-report in detecting taste dysfunction. *Laryngoscope*. 118(4):611–617.
- UCLA. 2015. *Lesson 3: logistic regression diagnostics* [Internet]. Los Angeles (CA): Institute for Digital Research and Education, University of California. Available from: <http://www.ats.ucla.edu/stat/stata/webbooks/logistic/chapter3/statalog3.htm>
- van Damme PA, Freihofer HP. 1992. Disturbances of smell and taste after high central midface fractures. *J Craniomaxillofac Surg*. 20(6):248–250.
- Wehling E, Nordin S, Espeseth T, Reinvang I, Lundervold AJ. 2011. Unawareness of olfactory dysfunction and its association with cognitive functioning in middle aged and old adults. *Arch Clin Neuropsychol*. 26(3):260–269.
- Welge-Lüssen A, Dörig P, Wolfensberger M, Krone F, Hummel T. 2011. A study about the frequency of taste disorders. *J Neurol*. 258(3):386–392.
